# Supplementary material for: A Qualitative Study to Understand the Potential Efficacy of an Information-Based Sugar Reduction Intervention among Low Socioeconomic Individuals in the UK
Source: PubMed Central journal article supplement (PMC6388364; doi:10.3390/ijerph16030413), 2019-01-31

Figure S1: Themes manifesting in one participant

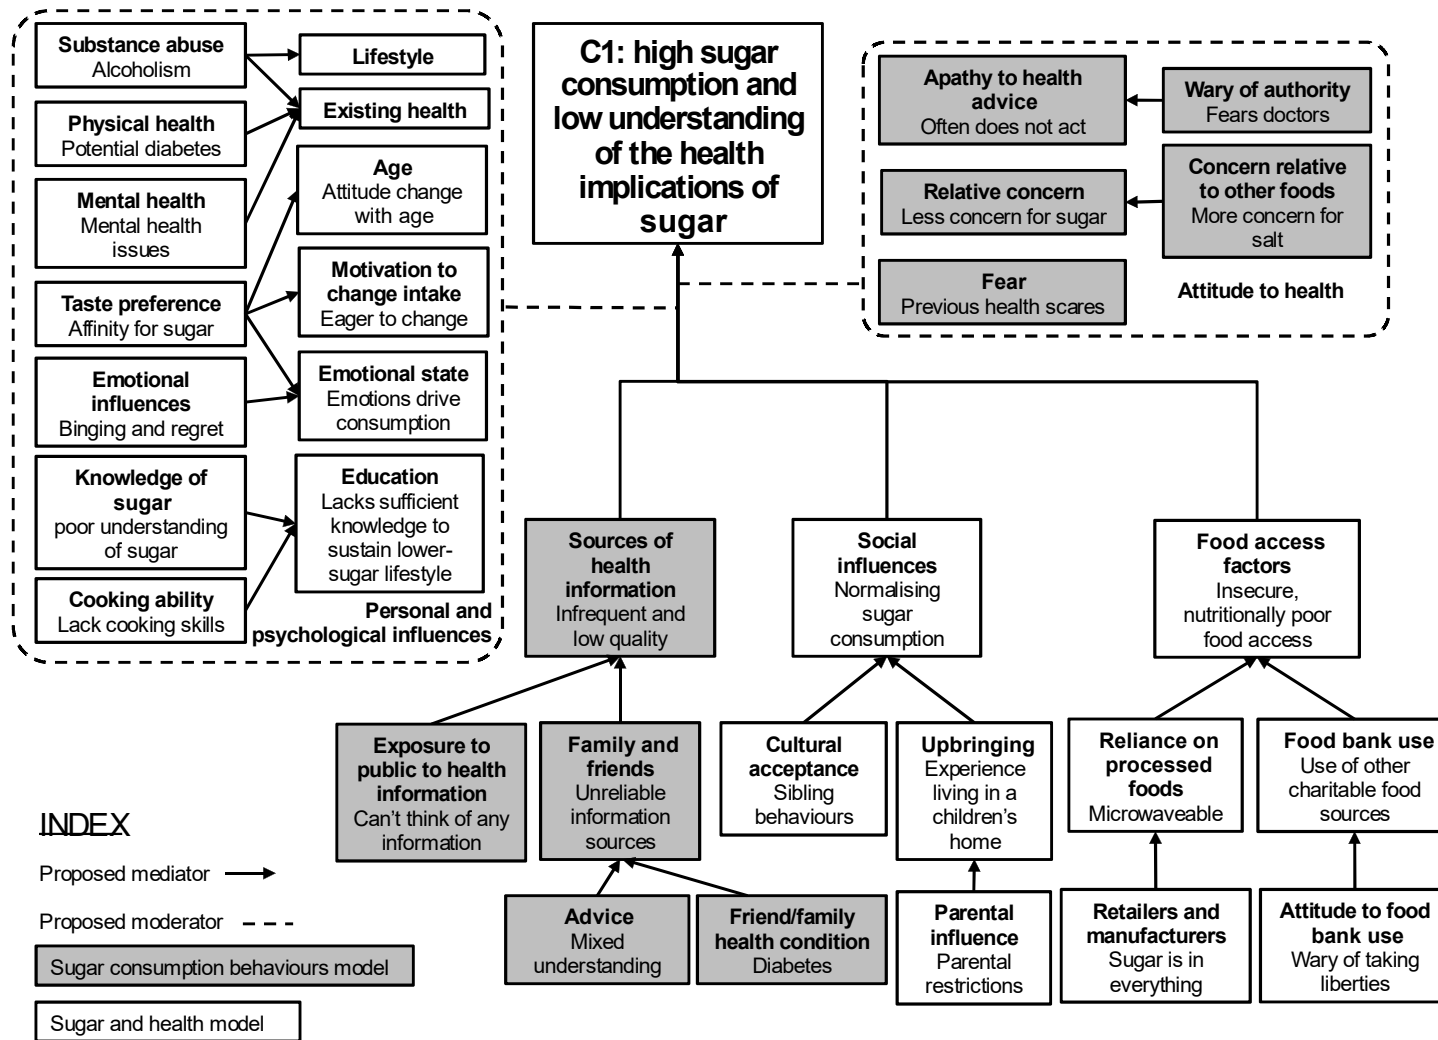

Supplement: ijerph-16-00413-s001.pdf [file ijerph-16-00413-s001.pdf]
